# Supplementary material for: Specific interactions of leucine with disaccharides by electrospray ionization mass spectrometry: application to rapid differentiation of disaccharide isomers in combination with statistical analysis
Source: Royal Society of Chemistry journal article supplement (doi:10.1039/c5an01735a), 2015-01-01
Supplement: c5an01735a1.pdf [file c5an01735a1.pdf]

### Supporting Information

#### **Specific interactions of leucine with disaccharides by electrospray ionization mass spectrometry: Application for rapid differentiation of disaccharide isomers in combination with statistical analysis**

Hang Yuan<sup>a</sup>, Jianxi Ying <sup>a</sup>, Peiran Deng<sup>a</sup>, Peng Chen<sup>a</sup>, Jinwen Shi<sup>b</sup>, Yan Liu<sup>a\*</sup>, Xiang Gao<sup>b\*</sup>, Yufen Zhao<sup>a,c</sup>

<sup>a</sup> Department of Chemical Biology, College of Chemistry and Chemical Engineering, Key Laboratory for Chemical Biology of Fujian Province, Xiamen University, Xiamen, Fujian, China, 361005.

<sup>b</sup> School of Pharmaceutical Sciences, Xiamen University, Xiamen, Fujian, China, 361102.

<sup>c</sup> Key Laboratory of Bioorganic Phosphorus Chemistry and Chemical Biology (Ministry of Education), Department of Chemistry, Tsinghua University, Beijing, China, 100084.

Corresponding Authors:

\* Dr. Yan Liu, E-mail: [stacyliu@xmu.edu.cn](mailto:stacyliu@xmu.edu.cn)

\* Dr. Xiang Gao, E-mail: [xgao@xmu.edu.cn](mailto:xgao@xmu.edu.cn)

### *List of Figures and Tables*

1. **Fig. S1** The stacked  $^1\text{H}$  NMR spectra for cellobiose (1 mmol) incubated with leucine (1 mmol) and KCl (0.1 mmol) in  $\text{D}_2\text{O}$  at room temperature.
2. **Fig. S2** ESI-IT-MS/MS spectra of complexes  $[\text{2Dis+Leu+K}]^+$  for three glucopyranosyl-glucose disaccharides in positive ion mode.
3. **Fig. S3** OPLS-DA analysis of  $[\text{2Dis+Leu+K}]^+$  complexes for twelve glucose-containing disaccharides by Q-TOF-MS/MS.
4. **Table S1** Formation of ternary Cello/AA/ $\text{K}^+$  complexes using ESI-IT-MS and Q-TOF-MS respectively.
5. **Table S2** ESI-Q-TOF-MS/MS data of  $[\text{2Dis+Leu+K}]^+$  at  $m/z$  854 as the precursor ion using Q-TOF mass spectrometry.

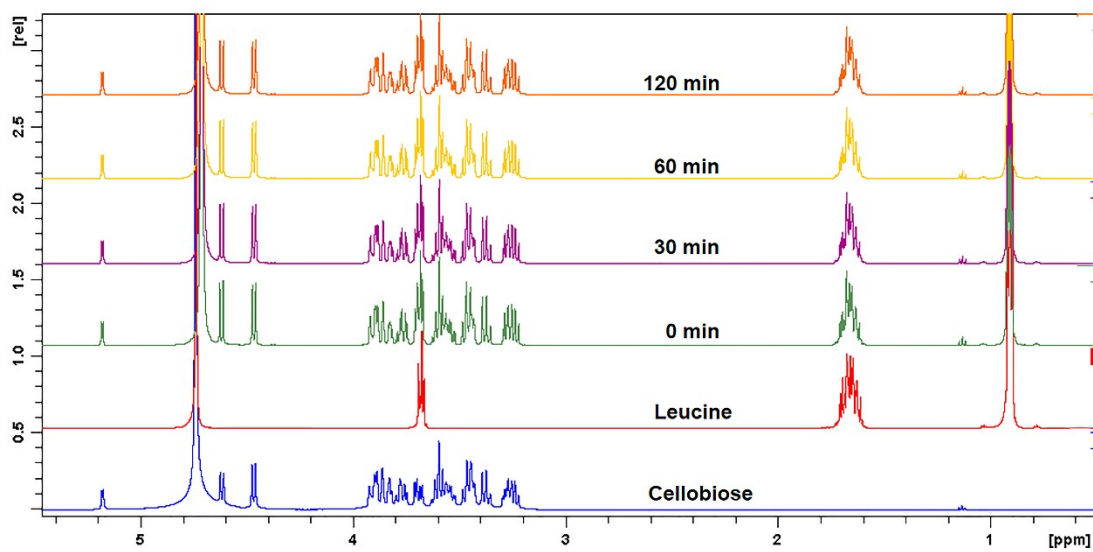

**Fig. S1** The stacked <sup>1</sup>H NMR spectra for cellobiose (1 mmol) incubated with leucine (1 mmol) and KCl (0.1 mmol) in D<sub>2</sub>O at room temperature.

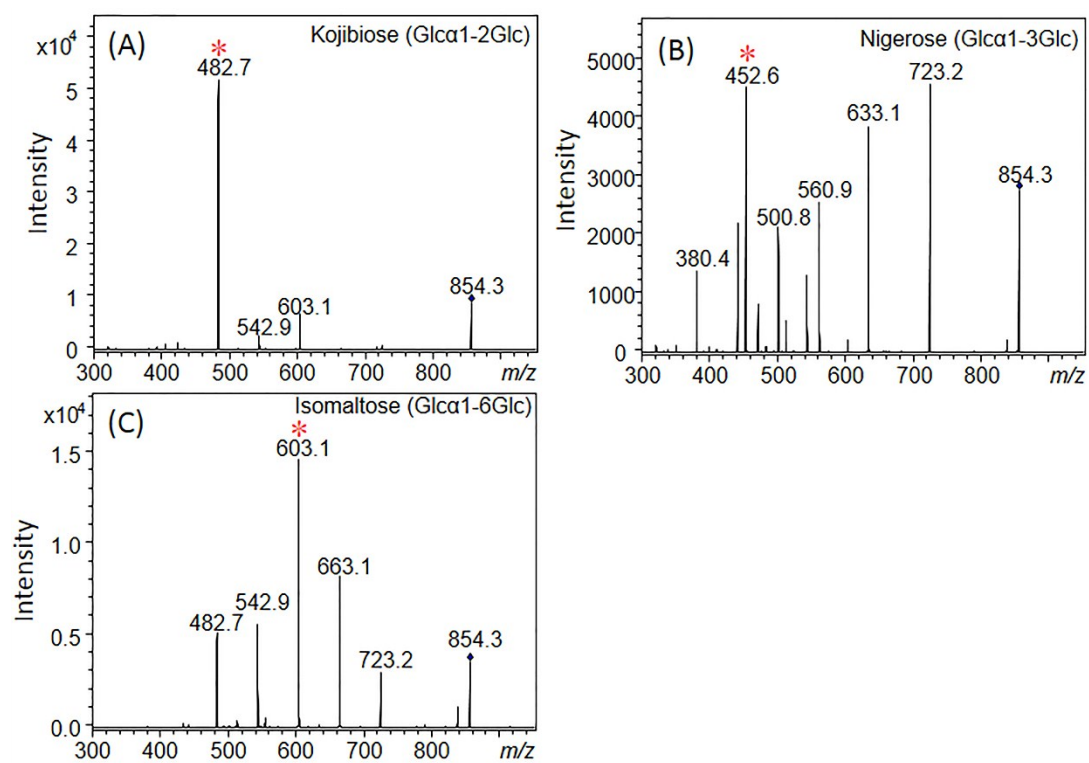

**Fig. S2** ESI-IT-MS/MS spectra of complexes  $[2\text{Dis}+\text{Leu}+\text{K}]^+$  for three glycopyranosyl-glucose disaccharides in positive ion mode. (A) Kojibiose ( $\text{Glc}\alpha 1\text{-}2\text{Glc}$ ); (B) Nigerose ( $\text{Glc}\alpha 1\text{-}3\text{Glc}$ ); (C) Isomaltose ( $\text{Glc}\alpha 1\text{-}6\text{Glc}$ ). The typical fragment ions were marked by “\*”.

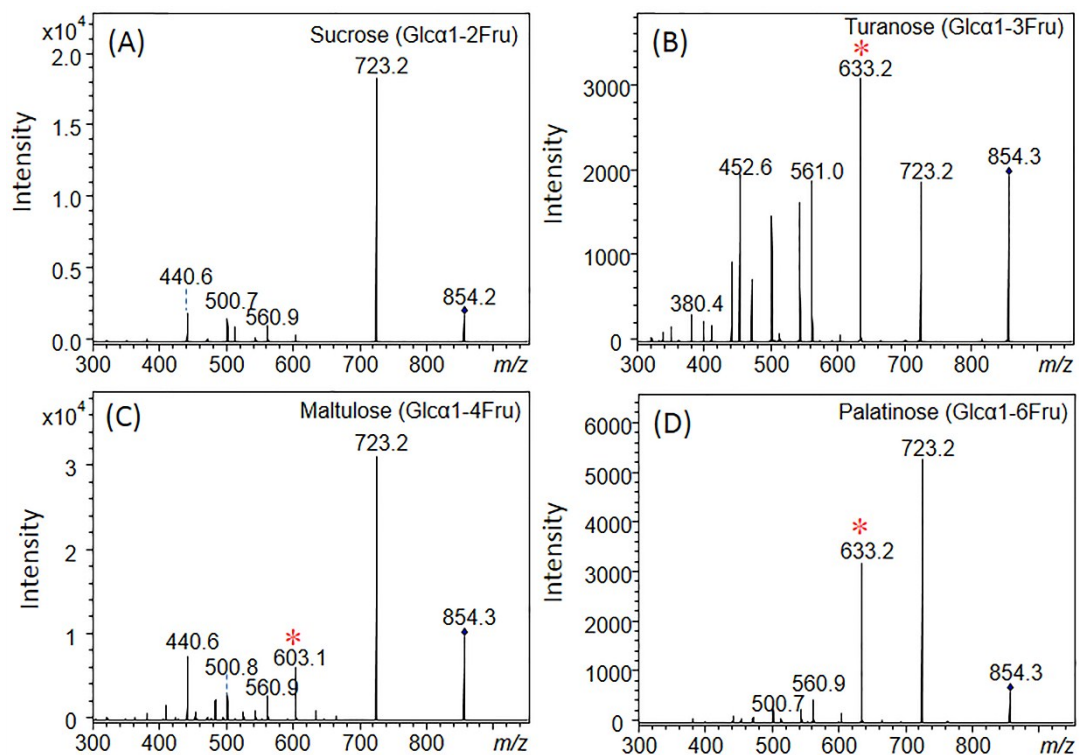

**Fig. S3** ESI-IT-MS/MS spectra of [2Dis+Leu+K]<sup>+</sup> complexes for four glucopyranosyl-fructose disaccharides in positive ion mode. (A) Sucrose (Glc $\alpha$ 1-2Fru); (B) Turanose (Glc $\alpha$ 1-3Fru); (C) Maltulose (Glc $\alpha$ 1-4Fru); (D) Palatinose (Glc $\alpha$ 1-6Fru). The typical fragment ions were marked by “\*”.

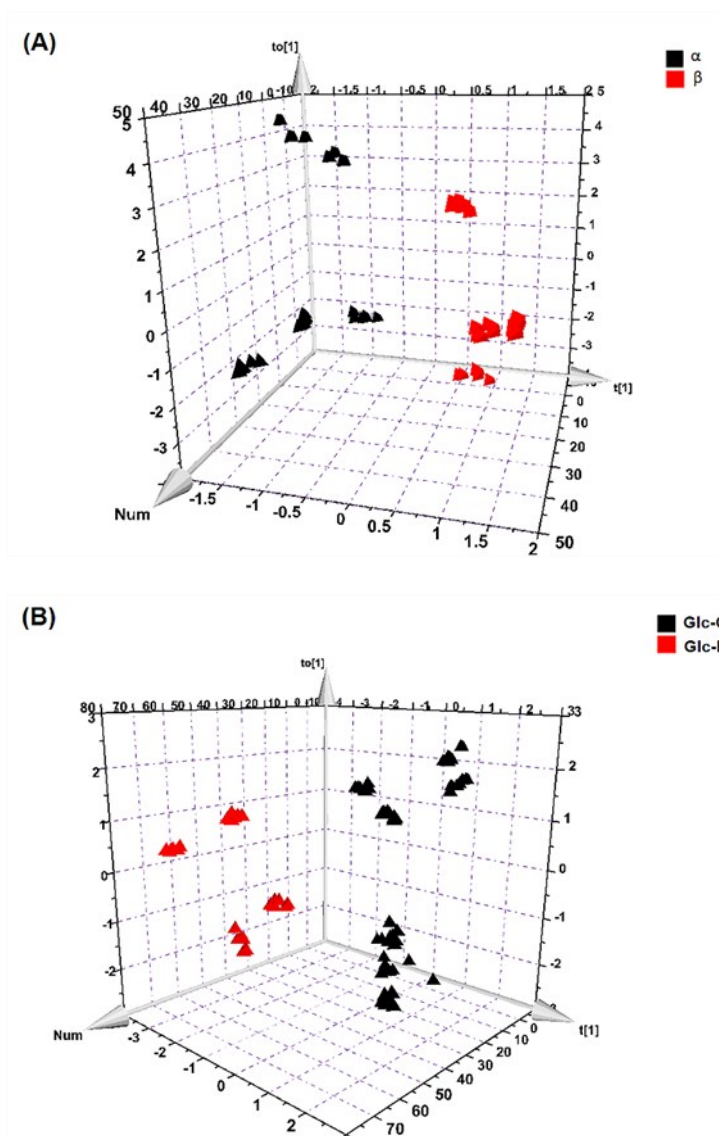

**Fig S4** OPLS-DA analysis of the complexes  $[2\text{Dis}+\text{Leu}+\text{K}]^+$  comprised by twelve glucose-containing disaccharides by Q-TOF-MS/MS. (A) Discrimination of  $\alpha$  isomers from  $\beta$  isomers; (B) Discrimination of Glc-Glc from Glc-Fru with different mono units.

**Table S1** Formation of ternary Cello/AA/K<sup>+</sup> complexes using ESI-IT-MS and Q-TOF-MS respectively.

| AA <sup>a</sup> | Cello+2AA+K <sup>+</sup> | Relative Abundance (%) |          | 2Cello+AA+K <sup>+</sup> | Relative Abundance (%) |          |
|-----------------|--------------------------|------------------------|----------|--------------------------|------------------------|----------|
|                 | Calculated Mass          | IT-MS                  | Q-TOF-MS | Calculated Mass          | IT-MS                  | Q-TOF-MS |
| Ala             | 559.2                    | n.d. <sup>b</sup>      | n.d.     | 812.2                    | n.d.                   | n.d.     |
| Arg             | 729.3                    | n.d.                   | n.d.     | 897.3                    | n.d.                   | n.d.     |
| Asn             | 645.2                    | n.d.                   | n.d.     | 855.2                    | n.d.                   | n.d.     |
| Asp             | 647.2                    | n.d.                   | n.d.     | 856.2                    | n.d.                   | n.d.     |
| Cys             | 623.1                    | n.d.                   | n.d.     | 844.2                    | n.d.                   | n.d.     |
| Glu             | 675.2                    | n.d.                   | n.d.     | 870.2                    | n.d.                   | n.d.     |
| Gln             | 673.2                    | n.d.                   | n.d.     | 869.3                    | n.d.                   | n.d.     |
| Gly             | 531.1                    | n.d.                   | n.d.     | 798.2                    | n.d.                   | n.d.     |
| His             | 691.2                    | n.d.                   | n.d.     | 878.3                    | n.d.                   | n.d.     |
| Ile             | 643.3                    | 10±4                   | 8±3      | 854.3                    | n.d.                   | n.d.     |
| Leu             | 643.3                    | 15±2                   | 12±3     | 854.3                    | 25±5                   | 20±6     |
| Lys             | 673.3                    | n.d.                   | n.d.     | 869.3                    | n.d.                   | n.d.     |
| Met             | 679.2                    | n.d.                   | n.d.     | 872.2                    | n.d.                   | n.d.     |
| Phe             | 711.2                    | n.d.                   | n.d.     | 888.3                    | n.d.                   | n.d.     |
| Pro             | 611.2                    | n.d.                   | n.d.     | 838.3                    | n.d.                   | n.d.     |
| Ser             | 591.2                    | 25±8                   | n.d.     | 828.2                    | n.d.                   | n.d.     |
| Thr             | 619.2                    | n.d.                   | n.d.     | 842.3                    | n.d.                   | n.d.     |
| Trp             | 789.3                    | n.d.                   | n.d.     | 927.3                    | n.d.                   | n.d.     |
| Tyr             | 743.2                    | n.d.                   | n.d.     | 904.3                    | n.d.                   | n.d.     |
| Val             | 615.2                    | 26±8                   | n.d.     | 840.3                    | n.d.                   | n.d.     |

<sup>a</sup> AA: amino acid; <sup>b</sup> n.d.: not detected

**Table S2** ESI-Q-TOF-MS/MS data of [2Dis+Leu+K]<sup>+</sup> at *m/z* 854 as the precursor ion.

| Structure           | Relative abundance of fragment ions (%; Data was exhibited as means S.E.M.) |            |             |             |            |            |            |             |             |            |             |
|---------------------|-----------------------------------------------------------------------------|------------|-------------|-------------|------------|------------|------------|-------------|-------------|------------|-------------|
|                     | 723                                                                         | 663        | 633         | 603         | 561        | 543        | 513        | 512         | 483         | 392        | 381         |
| Glc $\alpha$ 1-2Glc | 17 $\pm$ 1                                                                  |            |             | 100 $\pm$ 0 |            | 12 $\pm$ 1 | 62 $\pm$ 2 |             | 94 $\pm$ 3  | 6 $\pm$ 1  | 60 $\pm$ 2  |
| Glc $\beta$ 1-2Glc  | 20 $\pm$ 1                                                                  |            |             | 83 $\pm$ 3  |            |            | 45 $\pm$ 3 |             | 100 $\pm$ 0 | 10 $\pm$ 1 | 74 $\pm$ 2  |
| Glc $\alpha$ 1-3Glc | 100 $\pm$ 0                                                                 |            | 36 $\pm$ 4  |             | 6 $\pm$ 2  | 8 $\pm$ 2  |            | 46 $\pm$ 0  |             |            | 12 $\pm$ 2  |
| Glc $\beta$ 1-3Glc  | 100 $\pm$ 0                                                                 |            |             |             |            | 12 $\pm$ 1 |            | 96 $\pm$ 3  |             |            | 14 $\pm$ 0  |
| Glc $\alpha$ 1-4Glc | 69 $\pm$ 4                                                                  | 27 $\pm$ 3 |             | 45 $\pm$ 1  |            |            | 76 $\pm$ 2 |             | 7 $\pm$ 1   |            | 100 $\pm$ 0 |
| Glc $\beta$ 1-4Glc  | 72 $\pm$ 3                                                                  | 26 $\pm$ 5 |             | 100 $\pm$ 0 |            |            |            | 54 $\pm$ 5  | 7 $\pm$ 1   |            | 43 $\pm$ 3  |
| Glc $\alpha$ 1-6Glc | 61 $\pm$ 3                                                                  | 68 $\pm$ 4 |             | 90 $\pm$ 3  |            |            | 88 $\pm$ 4 |             | 10 $\pm$ 2  |            | 100 $\pm$ 0 |
| Glc $\beta$ 1-6Glc  | 79 $\pm$ 1                                                                  | 35 $\pm$ 4 |             | 41 $\pm$ 3  |            |            |            | 100 $\pm$ 0 |             |            | 40 $\pm$ 3  |
| Glc $\alpha$ 1-2Fru | 100 $\pm$ 0                                                                 |            |             |             |            |            |            | 41 $\pm$ 3  |             |            | 42 $\pm$ 3  |
| Glc $\alpha$ 1-3Fru | 68 $\pm$ 0                                                                  |            | 100 $\pm$ 0 |             | 10 $\pm$ 1 | 32 $\pm$ 1 | 46 $\pm$ 4 |             |             |            | 43 $\pm$ 1  |
| Glc $\alpha$ 1-4Fru | 100 $\pm$ 0                                                                 |            |             |             |            |            | 77 $\pm$ 4 |             |             |            | 48 $\pm$ 3  |
| Glc $\alpha$ 1-6Fru | 100 $\pm$ 0                                                                 |            | 31 $\pm$ 1  |             |            |            | 31 $\pm$ 1 |             |             |            | 37 $\pm$ 1  |
